# Supplementary material for: A Community in Life and Death: The Late Neolithic Megalithic Tomb at Alto de Reinoso (Burgos, Spain)
Source: PLoS One. 2016 Jan 20;11(1):e0146176. doi: 10.1371/journal.pone.0146176 (PMC4720281; doi:10.1371/journal.pone.0146176)
Supplement: S2 Table — Dating of human bone samples from Alto de Reinoso megalithic tomb was carried out in Klaus Tschira Laboratory for Radiometric Dating Methods at Curt Engelhorn Centre Archaeometry gGmbH, Mannheim, Germany. (XLSX) [file pone.0146176.s008.xlsx]

## Sheet: Munka1
S2 Table. 14C data of samples from the megalithic tomb of Alto de Reinoso. Radiocarbon dating was carried out by the Klaus Tschira Laboratory for Radiometric Dating Methods at the Curt Engelhorn Centre Archaeometry gGmbH, Mannheim, Germany
Sample	Lab Code	Identification	Ind. / Inv.	Material	14C Age (BP)	SD	δ13C	Age cal. BC (1σ)	Age cal. BC (2σ)	C:N	%C	%coll
Rein 1	MAMS-14325	1	Ind. 1	skull	4911	± 25	-20.9	3698−3657	3759−3643	3.3	19.6	7.8
Rein 17	MAMS-14326	2	Inv. 1022-23	skull	4854	± 26	-23.4	3691−3636	3697−3540	3.3	22.8	4.7
Rein 29	MAMS-14327	3	Inv. 2499-2501	skull	4933	± 27	-26.1	3756−3658	3769−3654	3.3	40.7	13.4
