# Supplementary material for: A Community in Life and Death: The Late Neolithic Megalithic Tomb at Alto de Reinoso (Burgos, Spain)
Source: PLoS One. 2016 Jan 20;11(1):e0146176. doi: 10.1371/journal.pone.0146176 (PMC4720281; doi:10.1371/journal.pone.0146176)
Supplement: S11 Table — The palaeogenetic information over various archaeological sites was classified according to archaeological, chronological information and/or geographical distribution. (XLSX) [file pone.0146176.s017.xlsx]

## Sheet: Table S10a Comparative datasets
S11 Table. Summary of prehistoric comparative mtDNA data. The palaeogenetic information over various archaeological sites was classified according to archaeological, chronological information and/or geographical distribution.
Region	Chronology	Denotation of group	Abbreviation	Site	No of individuals	References	Comments
Iberian Peninsula	Hunter-gatherer	Hunter-gatherer in Southwestern Europe (15)	HGSW	Toledo	1	Chandler 2003, 2005
				Arapouco	2	Chandler 2003, 2005
				Cabeço das Amoreiras	1	Chandler 2003, 2005
				Cabeço de Pez	3	Chandler 2003, 2005
				Poças de São Bento	1	Chandler et al. 2005
				Aizpea	1	Hervella et al. 2012
				Erralla	1	Hervella et al. 2012
				La Chora	1	Hervella et al. 2012
				La Pasiega	1	Hervella et al. 2012
				La Braña	2	Sánchez-Quínto et al. 2012
				El Miron	1	de-la-Rua et al. 2015
	Early Neolithic	Northeast Spain Early Neolithic (17)	NES_EN	Can Sadurni	5	Gamba et a. 2011	Two samples (CSA 0511, 24) from the Gamba et al. Paper were considered as not reproduced
				Cova d´ Avellaner	7	Lacan et al. 2011b
				El Trocs	5	Haak et al. 2015
		Northern Spain Early Neolithic (24)	NS_EN	Chaves	3	Gamba et al. 2011
				Paternanbidea	9	Hervella et al. 2012
				Los Cascajos Phase I	12	Hervella et al. 2012, M. A. Rojo-Guerra personal comm.	grave 70, 173, 182, 183, 194, 196, 203, 204, 222, 258, 497, 517
		Central Portugal Early Neolithic (9/9)	CP_EN	Gruta do Caldeirão	9	Chandler 2003, 2005
	Middle/Late Neolithic	Northeast Spain Middle/Late Neolithic (13)	NES_MLN	Sant Pau del Camp	2	Gamba et al. 2011	One sample (SP 26) from the Gamba et al. Paper was considered as not reproduced
				Camıi de Can Grau	11	Sampietro et al.2007
		North Spain Middle /Late Neolithic (16)	NS_MLN	Los Cascajos Phase II	4	Hervella et al. 2012, M. A. Rojo-Guerra personal comm.	grave 21, 33, 193, 257
				La Mina	5	Haak et al. 2015
				Fuente Hoz	6	Hervella et al. 2012
				Marizulo	1	Hervella et al. 2012
		Reinoso (26)	Reinoso	Reinoso	26	this study
		Central Portugal Late Neolithic -Chalcolithic (9)	CP_LN-CH	Algar do Bom Santo	3	Chandler 2003, 2005
				Perdigões	6	Chandler 2003, 2005
	Chalcolithic Spain	El Mirador (19)	El_Mirador	El Mirador	19	Gomez-Sanchez et al. 2014	El Mirador grave 9=5, therefore counted only once
France	Late Neolithic	Treilles culture (29)	TRE	Treilles	29	Lacan et al. 2011a
Central Europe	Hunter-gatherer	Hunter-gatherers in Central and North Europe (29)	HGC	Bad Dürrenberg	1	Bramanti et al. 2009
				Hohlenstein-Stadel	2	Bramanti et al. 2009
				Hohler Fels	1	Bramanti et al. 2009
				Drestwo	1	Bramanti et al. 2009
				Dudka	2	Bramanti et al. 2009
				Donkalnis	1	Bramanti et al. 2009
				Kretuonas	2	Bramanti et al. 2009
				Spiginas	1	Bramanti et al. 2009
				Oberkassel	1	Fu et al. 2013
				Reuland-Loschbour	1	Fu et al. 2013
				Dolny Vestonice	3	Fu et al. 2013
				Blätterhöhle	4	Bollongino et al. 2013
				Tiszaszőlős-Domaháza	1	Gamba et al. 2014
				Vela Spila	1	Szécsényi-Nagy et al. 2015
				Motala	7	Haak et al. 2015, Lazaridis et al. 2014
	Early Neolithic	Linear pottery culture (116)	LBK	Asparn Schletz 2	1	Haak et al. 2005
				Flomborn	6	Haak et al. 2005
				Eilsleben	1	Haak et al. 2005
				Derenburg, Meerenstieg II	22	Haak et al. 2005, 2010
				Halberstadt, Sonntagsfeld	29	Haak et al. 2005, Brandt et al. 2013
				Karsdorf	23	Brandt et al. 2013
				Naumburg	4	Brandt et al. 2013
				Oberwiederstedt I, Unterwiederstedt	8	Haak et al. 2005
				Schwetzingen	4	Haak et al. 2005
				Vaihingen	1	Haak et al. 2005
				Seehausen	1	Haak et al. 2005
				Stuttgart -Mülhausen Viesenhäuser Hof	10	Lazaridis et al. 2014, Haak et al. 2015
				Vedrovice	6	Bramanti 2008
		Rössen culture (18)	RSC	Esperstedt	1	Brandt et al. 2013
				Halberstadt, Sonntagsfeld	1	Brandt et al. 2013
				Oberwiederstedt III, Schrammhoehe	9	Brandt et al. 2013, Haak et al. 2015
				Oberwiederstedt IV, Arschkerbe Ost	1	Brandt et al. 2013
				Wittmar	6	Lee et al. 2013
		Schöningen group (33)	SCG	Salzmünde, Schiebzig	33	Brandt et al. 2013
	Middle Neolithic	Baalberge culture (20)	BAC	Halle-Queis	3	Brandt et al. 2013, Haak et al. 2015
				Karsdorf	1	Brandt et al. 2013
				Esperstedt	1	Brandt et al. 2013
				Quedlinburg VII 2	8	Brandt et al. 2013
				Quedlinburg IX	6	Brandt et al. 2013
				Salzmünde, Schiebzig	1	Brandt et al. 2013
		Salzmünde culture (29)	SMC	Salzmünde, Schiebzig	29	Brandt et al. 2013
		Bernburg culture (17)	BEC	Benzingerode I	17	Brandt et al. 2013
Carpathian Basin	Early Neolithic	Starcevo culture (44)	STA	all sites, as given in the reference	44	Szécsényi-Nagy et al. 2015
		Linear pottery culture in Transdanubia (39)	LBKT	all sites, as given in the reference	39	Szécsényi-Nagy et al. 2015
References:
Bollongino et al. 2013	Bollongino R, Nehlich O, Richards MP, Orschiedt J, Thomas MG, et al. (2013) 2000 Years of Parallel Societies in Stone Age Central Europe. Science Vol. 342 no. 6157 pp. 479-481 [DOI:10.1126/science.1245049]
Bramanti et al. 2009	Bramanti B, Thomas MG, Haak W, Unterlaender M, Jores P, et al. (2009) Genetic discontinuity between local hunter-gatherers and central Europe's first farmers. Science. 2009; 326(5949):137-40.
Bramanti 2008	Bramanti B (2008) Ancient DNA: Genetic analysis of aDNA from sixteen skeletons of the Vedrovice collection. Anthropologie. 46(2-3): 153-60.
Brandt et al. 2013	Brandt G, Haak W, Adler CJ, Roth C, Szecsenyi-Nagy A, et al. (2013) Ancient DNA Reveals Key Stages in the Formation of Central European Mitochondrial Genetic Diversity. Science 342: 257–261. doi:10.1126/science.1241844
Chandler et al. 2005	Chandler H Sykes B J. Zilhão (2005) Using ancient DNA to examine genetic continuity at the Mesolithic-Neolithic transition in Portugal. in Arias P Ontañón R García-Moncó C (eds.) Actas dell III Congreso del Neolítico en la Península Ibérica Santander Monografías del Instituto internacional de Investigaciones Prehistóricas de Cantabria 1 2005: 781-86
Chandler 2003	Chandler H (2003) Using Ancient DNA to Link Culture and Biology in Human Populations (University of Oxford 2003)
de-la-Rua et al. 2015	de-la-Rua C, Izagirre N, Alonso S, Hervella M (2015) Ancient DNA in the Cantabrian fringe populations: A mtDNA study from Prehistory to Late Antiquity.Quaternary International 364 (2015) 306e311
Gamba et al. 2011	Gamba C Fernández E Tirado M Deguilloux MF Pemonge et al. (2011) Ancient DNA from an Early Neolithic Iberian population supports a pioneer colonization by first farmers. Mol Ecol. 2012;21(1):45-56, Article first published online: 25 NOV 2011
Gamba et al. 2014	Gamba C, Jones ER, Teasdale MD, McLaughlin RL, Gonzalez-Fortes G. et al. (2014) Genome flux and stasis in a five millennium transect of European prehistory. Nature Communications 5, 5257.
Gomez-Sanchez et al. 2014	Gómez-Sánchez D, Olalde I, Pierini F, Matas-Lalueza L, Gigli E, et al. (2014) Mitochondrial DNA from El Mirador cave (Atapuerca, Spain) reveals the heterogeneity of Chalcolithic populations. PLoS One 9:e105105.
Fu et al. 2013	Fu Q, Mittnik A, Johnson PLF, Bos K, Lari M, et al. (2013) A Revised Timescale for Human Evolution Based on Ancient Mitochondrial Genomes. Current biology : CB 23: 1–7. doi:10.1016/j.cub.2013.02.044
Haak et al. 2015	Haak W, Lazaridis I, Patterson N, Rohland N, Mallick S, et al. (2015)Massive migration from the steppe was a source for Indo-European languages in Europe. Nature. 2015. doi:10.1038/nature14317.
Haak et al. 2010	Haak W Balanovsky O Sanchez JJ Koshel S Zaporozhchenko V et al. (2010) Ancient DNA from European early neolithic farmers reveals their near eastern affinities. PLoS Biol. 2010; 8(11):e1000536.
Haak et al. 2005	Haak W, Forster P, Bramanti B, Matsumura S, Brandt G, et al. (2005) Ancient DNA from the first European farmers in 7500-year-old Neolithic sites. Science. 2005; 310(5750):1016-8.
Hervella et al. 2012	Hervella M, Izagirre N, Alonso S, Fregel R, Alonso A, Cabrera VM, de la Rúa C. (2012) Ancient DNA from Hunter-Gatherer and Farmer Groups from Northern Spain Supports a Random Dispersion Model for the Neolithic Expansion into Europe. PLoS one. 2012; 7(4):e34417.
Lacan et al. 2011a	Lacan M, Keyser C, Ricaut FX, Brucato N, Duranthon F et al. (2011) Ancient DNA reveals male diffusion through the Neolithic Mediterranean route. Proc Natl Acad Sci U S A. 2011; 108(24):9788-91
Lacan et al. 2011b	Lacan M, Keyser C, Ricaut FX, Brucato N, Tarrús J, et al. (2011) Ancient DNA suggests the leading role played by men in the Neolithic dissemination. Proc Natl Acad Sci U S A. 2011; 108(45):18255-9.
Lazaridis et al. 2014	Lazaridis I, Patterson N, Mittnik A, Renaud G, Mallicket S, et al. (2014) Ancient human genomes suggest three ancestral populations for present-day Europeans. Nature. 2014;513(7518):409-413. doi:10.1038/nature13673.
Lee et al. 2013	Lee EJ, Krause-Kyora B, Rinne C, Schütt R, Harder M, et al. (2013) Ancient DNA insights from the Middle Neolithic in Germany. Archaeol Anthropol Sci. doi:DOI 10.1007/s12520-013-0173-0.
Rivollat et al. 2015	Rivollat M, Mendisco F,Pemonge MH, Safi A, Saint-Marc D, Brémond A, et al. (2015) When the Waves of European Neolithization Met: First Paleogenetic Evidence from Early Farmers in the Southern Paris Basin Plos One 10(4) Published: April 30, 2015DOI: 10.1371/journal.pone.0125521
Sampietro et al. 2007	Sampietro ML, Lao O, Caramelli D, Lari M, Pou R, et al. (2007) Palaeogenetic evidence supports a dual model of Neolithic spreading into Europe. Proc Biol Sci. 2007; 274(1622):2161-7.
Sánchez-Quinto et al. 2012	Sánchez-Quinto F, Schroeder H, Ramirez O, Avila-Arcos MC, Pybus M, et al. (2012) Genomic Affinities of Two 7000-Year-Old Iberian Hunter-Gatherers. Curr Biol. http://dx.doi.org/10.1016/j.cub.2012.06.005
Szécsényi-Nagy et al. 2015	Szécsényi-Nagy A, Brandt G, Haak W, Keerl V, Jakucs J, et al. (2015)Tracing the genetic origin of Europe ’ s first farmers reveals insights into their social organization. Proc R Soc B. 2015;282:20150339. doi:http://dx.doi.org/10.1098/rspb.2015.0339.
