# Supplementary material for: A Community in Life and Death: The Late Neolithic Megalithic Tomb at Alto de Reinoso (Burgos, Spain)
Source: PLoS One. 2016 Jan 20;11(1):e0146176. doi: 10.1371/journal.pone.0146176 (PMC4720281; doi:10.1371/journal.pone.0146176)
Supplement: S12 Table — Culture information and references to comparative data are presented in S10 Table. (XLSX) [file pone.0146176.s018.xlsx]

## Sheet: Table S10b. PCA
S12 Table. Relative MtDNA haplogroup frequencies, used for the principal component analysis. Culture information and references to comparative data are presented in S10 Table.
					Mitochondrial haplogroups
Continent	Country	Population	n	Abbr.	H	H5	HV	V	I	J	K	N	N1a	R	T1	T2	U	U2	U3	U4	U5a	U5b	U8	W	X	References
Europe, south	Spain	Reinoso site	26	Reinoso	3.84615	0	0	7.69231	0	3.84615	26.9231	0	0	0	0	15.3846	0	0	0	3.84615	0	26.9231	0	0	11.5385	this study (26)
Europe, central, north	Germany, Lithunia, Poland, Croatia	Hunter-gatherer Central and North Europe	29	HGC	0	0	0	0	0	0	0	0	0	3.44828	0	0	6.89655	10.3448	0	6.89655	27.5862	41.3793	3.44828	0	0	Bramanti et al. 2009 (11), Fu et al. 2013 (2), Bollongoni et al. 2013 (4), Fu et al. 2013 (3), Gamba et al. 2014 (1), Szécsényi-Nagy et al. (1), Lazaridis et al. 2014, Haak et al. 2015 (7)
Europe, south	Spain, Portugal	Hunter-gatherer Southwest Europe	15	HGSW	46.6667	0	0	0	0	0	0	13.3333	0	0	0	0	0	0	0	6.66667	0	33.3333	0	0	0	Hervella et al. 2012 (4), Sanchez-Quinto et al. 2012 (2), Chandler et al. 2005, Chandler 2003 (8), de-la-Rua et al. 2015 (1)
Europe, central, southeast	Hungary, Croatia	Starčevo culture	44	STA	4.54545	2.27273	2.27273	6.81818	0	11.3636	27.2727	0	6.81818	0	2.27273	20.4545	0	0	2.27273	2.27273	0	0	0	4.54545	6.81818	Szécsényi-Nagy et al. 2015 (44)
Europe, central	Hungary	Linear pottery culture in Transdanubia	39	LBKT	25.641	5.12821	2.5641	2.5641	0	7.69231	12.8205	0	10.2564	0	2.5641	25.641	0	2.5641	0	0	2.5641	0	0	0	0	Szécsényi-Nagy et al. 2015 (39)
Europe, central	Germany, Austria, Czech Republic	Linear pottery culture in Central Europe	116	LBK	16.3793	0	5.17241	3.44828	0	11.2069	18.9655	0	11.2069	0	0	25.8621	0	0	0.862069	0	1.72414	0.862069	0	3.44828	0.862069	Haak et al. 2005 (18), Bramanti 2008 (6), Haak et al. 2010 (22), Brandt et al. 2013 (60), Lazaridis et al. 2014 (1), Haak et al. 2015 (9)
Europe, central	Germany	Rössen culture	18	RSC	16.6667	11.1111	22.2222	5.55556	0	0	11.1111	0	5.55556	0	0	11.1111	0	0	0	0	0	11.1111	0	0	5.55556	Brandt et al. 2013 (11), Lee et al. 2013 (6), Haak et al. 2015 (1)
Europe, central	Germany	Schöninger group	33	SCG	15.1515	0	3.0303	0	0	15.1515	30.303	0	3.0303	0	0	12.1212	0	0	0	0	0	6.06061	3.0303	9.09091	3.0303	Brandt et al. 2013 (33)
Europe, central	Germany	Baalberge culture	20	BAC	25	0	5	0	0	5	15	0	5	0	0	25	0	0	0	0	0	5	5	0	10	Brandt et al. 2013 (18), Haak et al. 2015 (2)
Europe, central	Germany	Salzmünde culture	29	SMC	13.7931	17.2414	3.44828	3.44828	0	20.6897	10.3448	0	6.89655	0	0	6.89655	0	0	10.3448	0	0	3.44828	0	0	3.44828	Brandt et al. 2013 (29)
Europe, central	Germany	Bernburg culture	17	BEC	17.6471	5.88235	0	5.88235	0	0	17.6471	0	0	0	0	11.7647	0	0	0	0	11.7647	17.6471	0	5.88235	5.88235	Brandt et al. 2013 (17)
Europe, west	France	Treilles culture	29	TRE	20.6897	0	6.89655	3.44828	0	20.6897	6.89655	0	0	0	0	6.89655	3.44828	0	0	0	3.44828	13.7931	0	0	13.7931	Lacan et al. 2011a (29)
Europe, west	Spain	Northeast Spain Early Neolithic	17	NES_EN	11.7647	0	0	5.88235	0	5.88235	29.4118	11.7647	5.88235	0	0	17.6471	0	0	0	0	0	5.88235	0	0	5.88235	Gamba et al. 2011 (5), Lacan et al. 2011b (7), Haak et al. 2015 (5)
Europe, west	Spain	Northern Spain Early Neolithic	24	NS_EN	54.1667	0	4.16667	0	4.16667	4.16667	8.33333	0	0	0	0	0	20.8333	0	0	0	0	4.16667	0	0	0	Gamba et al. 2011 (2), Hervella et al. 2012 (36)
Europe, west	Portugal	Central Portugal Early Neolithic	9	CP_EN	66.6667	0	0	11.1111	0	0	0	0	0	0	0	0	11.1111	0	0	0	0	11.1111	0	0	0	Chandler et al. 2005, Chandler 2003 (9)
Europe, west	Portugal	Central Portugal Late Neolithic and Chalcolithic	9	CP_LN_CH	66.6667	0	0	0	0	0	0	0	0	0	0	0	0	0	0	0	33.3333	0	0	0	0	Chandler et al. 2005, Chandler 2003 (9)
Europe, west	Spain	El Mirador-Chalcolithic population	19	El_Mirador	26.3158	0	0	0	0	10.5263	21.0526	0	0	0	0	21.0526	0	0	5.26316	0	0	0	0	0	15.7895	Gomez-Sanchez et al. 2014 (20)
Europe, west	Spain	Northeast Spain Middle/Late Neolithic	13	NES_MNL	30.7692	0	0	0	7.69231	15.3846	7.69231	7.69231	0	0	0	15.3846	0	0	0	7.69231	0	0	0	7.69231	0	Sampietro et al. 2007 (11), Gamba et al. 2011 (2)
Europe, west	Spain	Northern Spain Middle/Late Neolithic	16	NS_MNL	37.5	0	0	0	0	6.25	12.5	0	0	0	0	0	18.75	0	0	0	0	18.75	0	0	6.25	Hervella et al. 2012 (11), Haak et al. 2015 (5)
